# Supplementary material for: PDGFRα Enhanced Infection of Breast Cancer Cells with Human Cytomegalovirus but Infection of Fibroblasts Increased Prometastatic Inflammation Involving Lysophosphatidate Signaling
Source: MDPI journal article supplement (doi:10.3390/ijms22189817), 2021-09-10
Supplement: s1 [file s1]

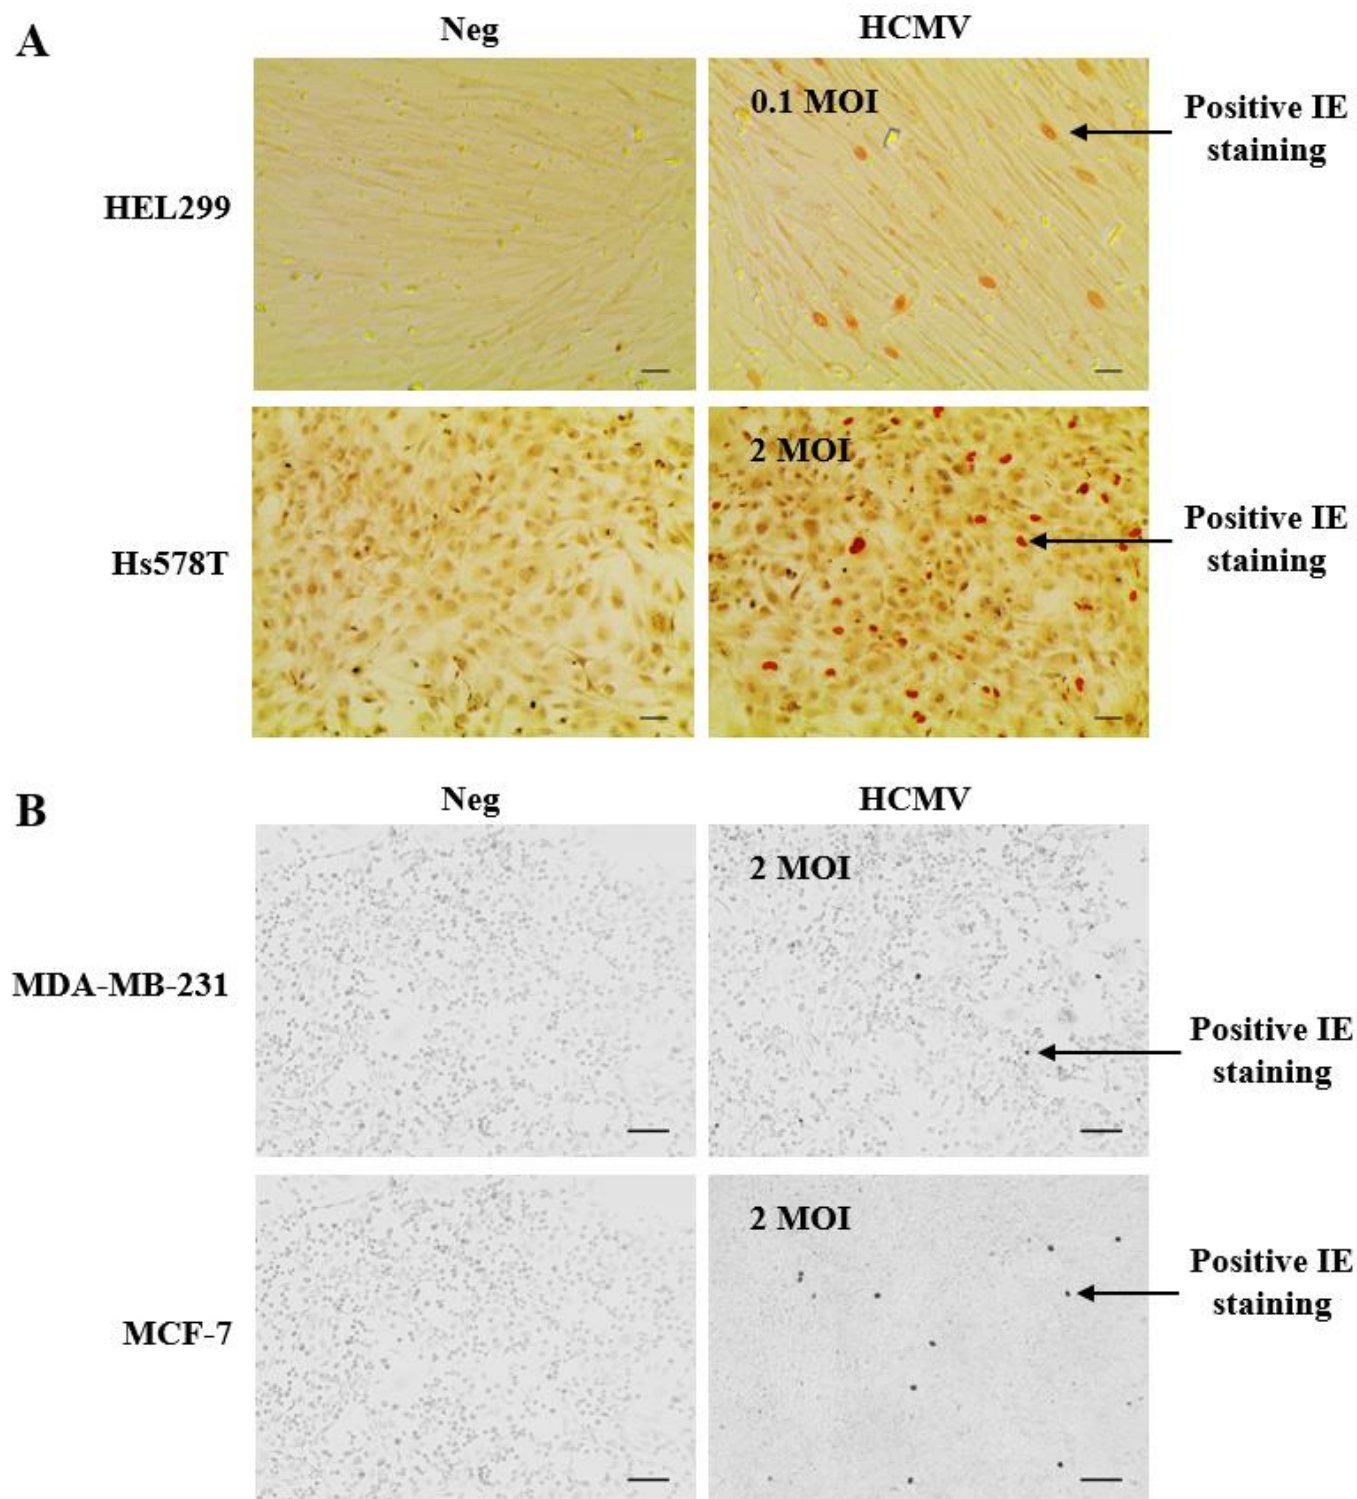

**Figure S1.** Immediate early (IE) antigen staining in HCMV-challenged human fibroblasts and breast cancer cells. Representative images of the cells stained for IE antigen at 36 h after initial exposure to 0.1 or 2 MOI of HCMV in HEL299 fibroblasts or breast cancer cells, respectively or to the equivalent volume of media with infectious virus filtered out as a negative control (Neg). (A) Images were taken at 20 $\times$ . Scale = 50 $\mu$ m. (B) Images were taken at 10 $\times$ . Scale = 100 $\mu$ m.

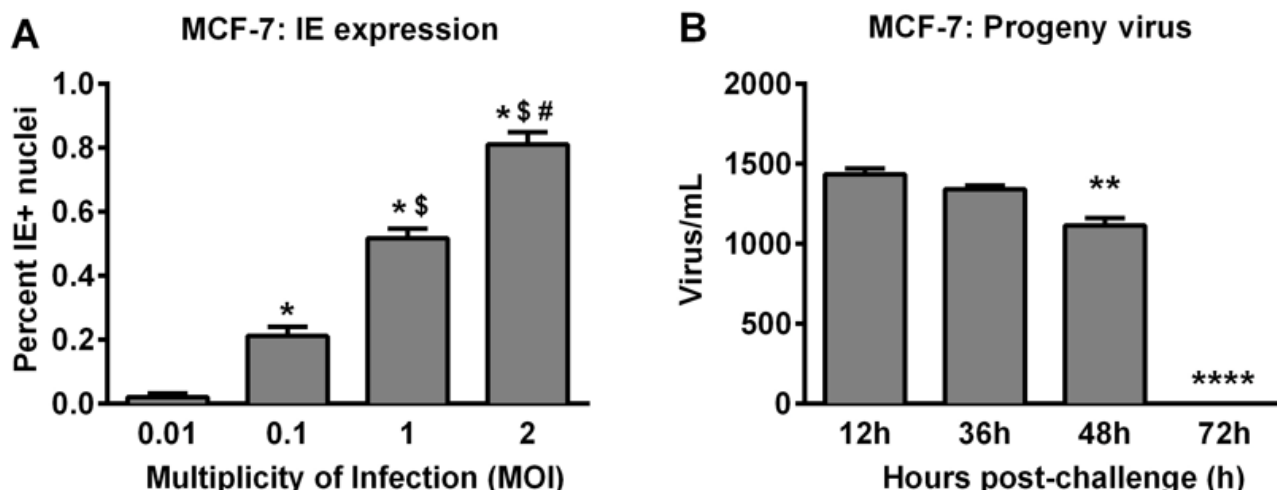

**Figure S2.** Limited immediate early (IE) antigen expression and production of progeny virus in MCF-7 breast cancer cells exposed to HCMV. (A) Cells were challenged with HCMV at MOIs of 0.01, 0.1, 1 or 2, then stained for the IE antigen at 36 h post-viral challenge to determine the percent IE-positive nuclei which were quantified using the average of 5 randomly chosen fields. Results are expressed as mean  $\pm$  SEM from three independent experiments and *P*-values were calculated by one-way ANOVA with a Tukey's post-hoc test. \*, *P* < 0.01 compared to 0.01 MOI; \$, *P* < 0.01 compared to 0.1 MOI; #, *P* < 0.05 compared to 1 MOI. (B) Infectious virus was quantified from cell lysates obtained 12, 36, 48, or 72 h after exposure to 2 MOI of HCMV. Cells were washed with HEPES-buffered saline at pH 7.4 after an initial 2 h viral exposure, then further cultured in normal media with collection of lysates at each timepoint. Lysates were added to fresh uninfected HEL299 fibroblasts for 24 h and stained for HCMV IE antigen denoting infectious virus in the lysates, with results expressed as virus/mL. Results are from 3 independent experiments. *P*-values were calculated by one-way ANOVA with a Tukey's post-hoc test. \*\*, *P* < 0.01 compared to 12 and 36 h; \*\*\*\*, *P* < 0.0001 compared to all other times.

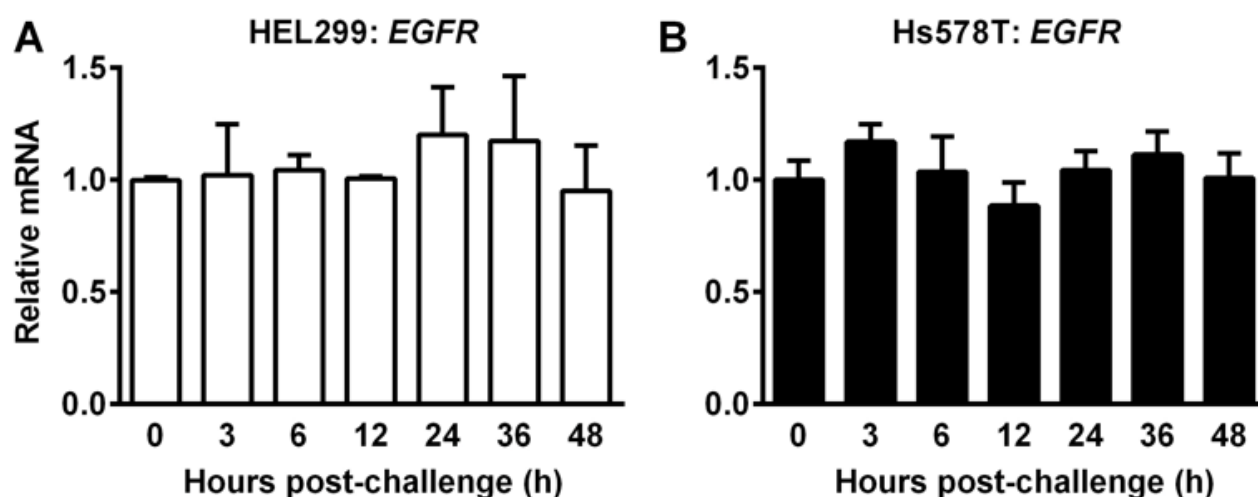

**Figure S3.** *EGFR* mRNA expression did not change in HEL299 or Hs578T cells exposed to HCMV. HEL299 fibroblasts (A) and Hs578T breast cancer cells (B) were exposed HCMV at 1 or 2 MOI, respectively. Lysates were collected at each timepoint and mRNA expression was measured. Results are expressed relative to cells treated with the equivalent volume of media with infectious virus filtered out as a negative control at each timepoint, and then normalized to 0 h. Results are expressed as mean  $\pm$  SEM from five independent experiments and *P*-values were calculated by one-way ANOVA with no significant differences found.

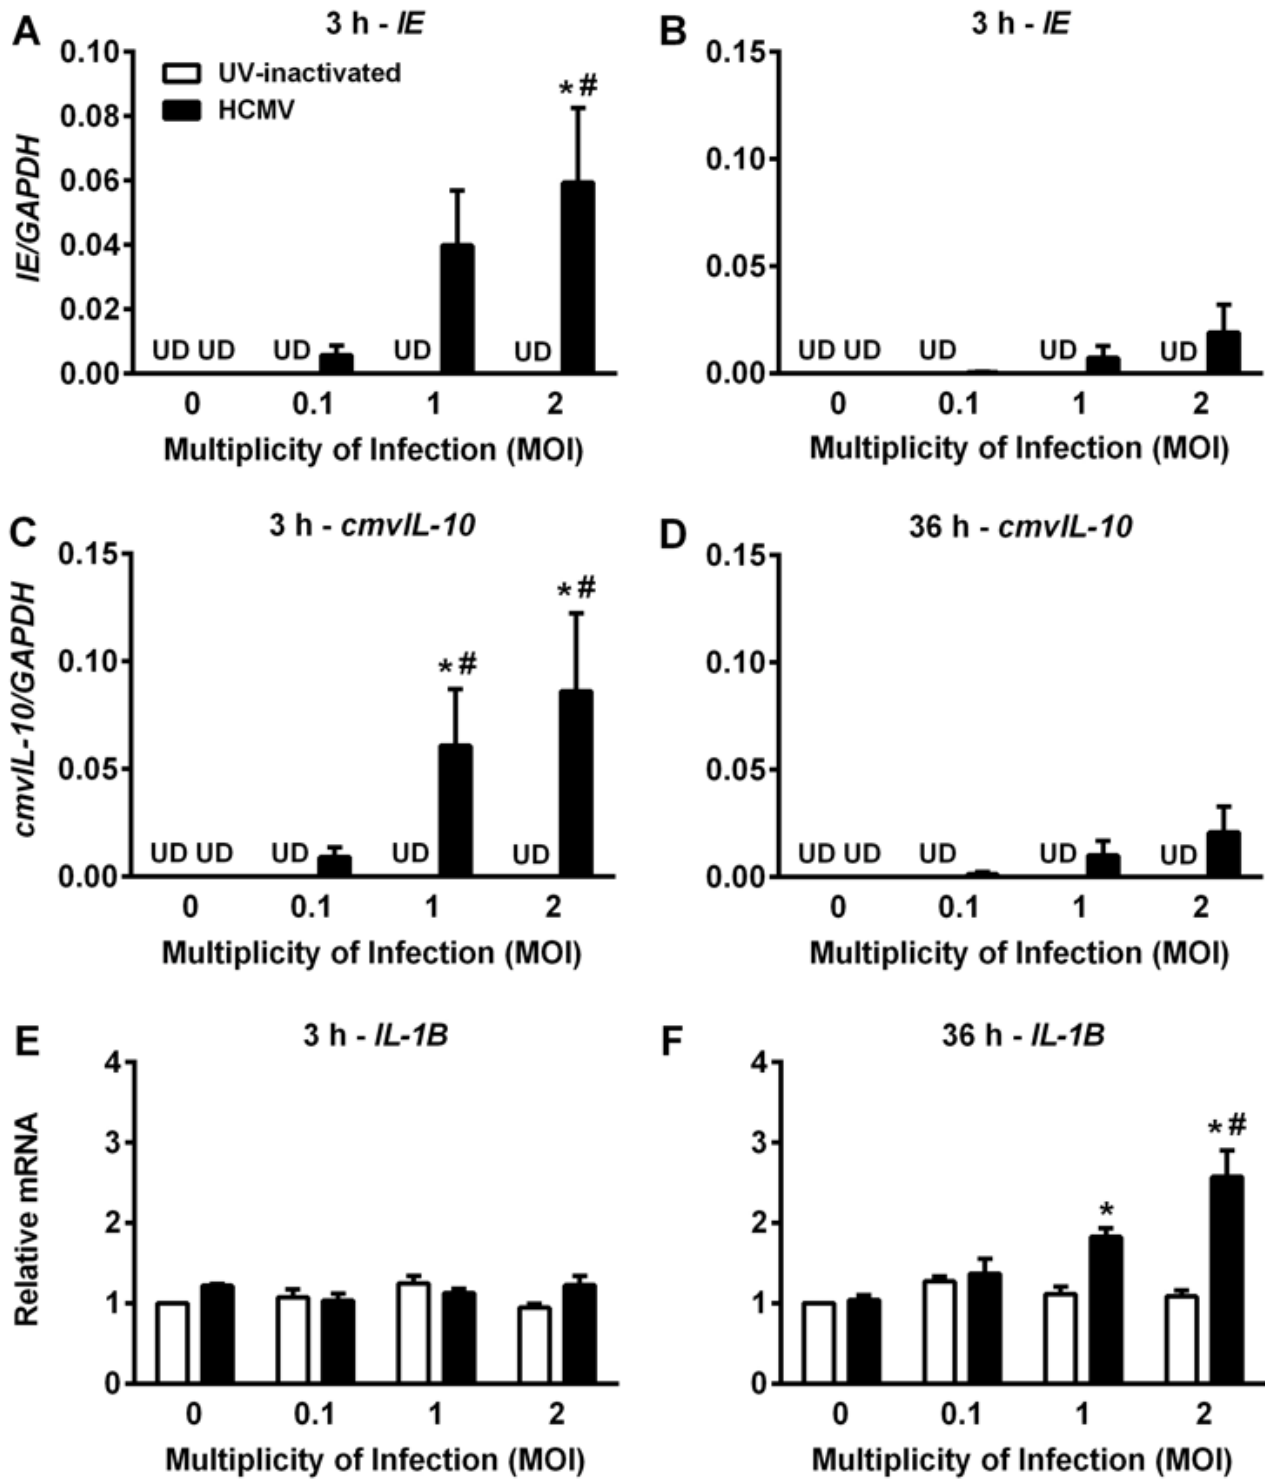

**Figure S4.** UV-inactivated virus did not stimulate mRNA expression of viral genes or *IL-1B* in breast cancer cells. MDA-MB-231 breast cancer cells were exposed to UV-inactivated virus or HCMV at MOIs of 0, 0.1, 1 or 2. Lysates were collected at 3 and 36 h post-challenge for mRNA expression analysis. (A–D) Expression of the viral genes was normalized against glyceraldehyde 3-phosphate dehydrogenase (*GAPDH*). (E) and (F) Expression of *IL-1B* was expressed relative to cells treated with the equivalent volume of media with infectious virus filtered out as a negative control at each timepoint, and then normalized to 0 h. Results are expressed as mean  $\pm$  SEM from three independent experiments and *P*-values were calculated by two-way ANOVA and Tukey's post-hoc test. \*, *P* < 0.05 compared to 0 MOI; #, *P* < 0.05 compared to UV-inactivated treatment.

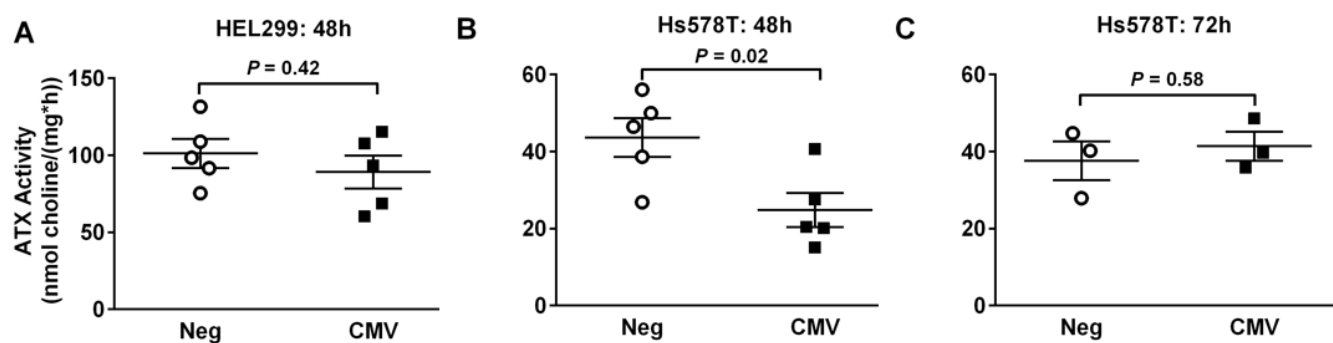

**Figure S5.** ATX activity was decreased in culture media from Hs578T breast cancer cells but not from HEL299 fibroblasts exposed to HCMV. Cells were exposed to HCMV at 1 or 2 MOI for HEL299 (A) and Hs578T (B,C) breast cancer cells, respectively or to the equivalent volume of media with infectious virus filtered out as a negative control (Neg). Culture media were collected at 48 or 72 h post-viral challenge to determine ATX activity. Results are expressed as mean  $\pm$  SEM from three independent experiments and *P*-values were calculated by unpaired Student's *t*-test.

**Table S1.** Primer sequences of genes assayed by qPCR.

| Gene                 | Primer Sequence                                                                |
|----------------------|--------------------------------------------------------------------------------|
| <i>GAPDH</i>         | Forward: 5'-TCCTGCACCACCAACTGCTT-3'<br>Reverse: 5'-TCTTACTCCTTGGAGGCCAT-3'     |
| <i>HCMV IE</i>       | Forward: 5'-TGAGGATAAGCGGGAGATGT-3'<br>Reverse: 5'-ACTGAGGCAAGTTCTGCAGT-3'     |
| <i>cmvIL-10</i>      | Forward: 5'-TCGGTGATGGTCTCTTCCTC-3'<br>Reverse: 5'-CGTCGCAATAAACCGTACCT-3'     |
| <i>PDGFRA</i>        | Forward: 5'-TAGTGCTTGGTCGGGTCTTG-3'<br>Reverse: 5'-TTCATGACAGGTTGGGACCG-3'     |
| <i>EGFR</i>          | Forward: 5'-CTCTGCCTTGAGTCATCTATTC-3'<br>Reverse: 5'-CTACCTGAATTCCACACTACTC-3' |
| <i>IL-1B</i>         | Forward: 5'-AGATGAAGTGCTCCTTCCAGGAC-3'<br>Reverse: 5'-TGCCTGAAGCCCTTGCTGTA-3'  |
| <i>IL-6</i>          | Forward: 5'-AGCCAGAGCTGTGCAGATGA-3'<br>Reverse: 5'-CTGCAGCCACTGGTTCTGTG-3'     |
| <i>COX-2 (PTGS2)</i> | Forward: 5'-ATGAGTGTGGGATTTGACCA-3'<br>Reverse: 5'-ATTCCGGTGTGAGCAGTTT-3'      |
| <i>ATX (ENPP2)</i>   | Forward: 5'-CATTTATTGGTGGAACGCAGA-3'<br>Reverse: 5'-ACTTTGTCAAGCTCATTTCC-3'    |
| <i>LPAR2</i>         | Forward: 5'-CTGCTCATGGTGGCTGTGTA-3'<br>Reverse: 5'-TACAGCCAGGACATTGCAGG-3'     |
| <i>LPP1</i>          | Forward: 5'-GGTCAAAAATCAACTGCAG-3'<br>Reverse: 5'-TGGCTTGAAGATAAAGTGC-3'       |
| <i>LPP2</i>          | Forward: 5'-TGGCCAAGTACATGATTGG-3'<br>Reverse: 5'-AGCAGCCGTCCTCCCACTTCC-3'     |
| <i>LPP3</i>          | Forward: 5'-CCCGGCGCTCAACAACAACC-3'<br>Reverse: 5'-TCTCGATGATGAGGAAGGG-3'      |

**Table S2.** Secretion of cytokines, chemokines and growth factors for HCMV uninfected and infected HEL299 fibroblasts.

| Cytokines/Chemokines | Neg Control     |        | CMV             |        | P-Value |
|----------------------|-----------------|--------|-----------------|--------|---------|
|                      | N = 5           |        | N = 5           |        |         |
|                      | (pg/mg Protein) |        | (pg/mg Protein) |        |         |
|                      | Mean            | SEM    | Mean            | SEM    |         |
| CCL1                 | 1.1             | 0.3    | 1.5             | 0.3    | 0.42    |
| CCL3                 | 4.0             | 0.5    | 55.6            | 28.8   | 0.11    |
| CCL7                 | 198.7           | 58.3   | 109.4           | 32.6   | 0.22    |
| CCL8                 | 12.9            | 7.0    | 54.5            | 23.3   | 0.13    |
| CCL11                | 19.0            | 3.4    | 24.5            | 6.5    | 0.47    |
| CX3CL1               | 50.7            | 10.9   | 52.6            | 13.2   | 0.92    |
| CXCL1                | 381.1           | 289.1  | 22.1            | 6.1    | 0.25    |
| CXCL5                | 1238.0          | 777.5  | 9.3             | 6.1    | 0.15    |
| CXCL10               | 476.6           | 196.0  | 515.4           | 236.8  | 0.90    |
| CXCL13               | 1.3             | 0.3    | 1.1             | 0.3    | 0.67    |
| EGF                  | 6.5             | 1.8    | 12.2            | 4.4    | 0.26    |
| FGF-β                | 92.4            | 33.8   | 85.2            | 17.6   | 0.85    |
| FLT-3L               | 2.2             | 0.2    | 3.0             | 0.6    | 0.24    |
| G-CSF                | 10.4            | 6.6    | 180.1           | 77.3   | 0.06    |
| IFNα2                | 13.0            | 2.6    | 19.0            | 3.7    | 0.22    |
| IFNγ                 | 0.9             | 0.1    | 2.4             | 0.7    | 0.06    |
| IL-1β                | 5.3             | 1.9    | 5.3             | 1.3    | 0.99    |
| IL-1RA               | 1.3             | 0.3    | 1.7             | 0.3    | 0.46    |
| IL-2                 | 0.5             | 0.2    | 0.9             | 0.4    | 0.38    |
| IL-8                 | 2626.0          | 1849.0 | 8356.0          | 2128.0 | 0.08    |
| IL-9                 | 4.0             | 0.7    | 6.2             | 2.0    | 0.35    |
| IL-10                | 2.0             | 0.3    | 2.0             | 0.4    | 0.96    |
| IL-12p40             | 19.3            | 2.0    | 28.6            | 6.9    | 0.23    |
| IL-13                | 22.8            | 4.8    | 11.4            | 4.3    | 0.11    |
| IL-15                | 26.1            | 3.3    | 30.5            | 6.0    | 0.54    |
| IL-17A               | 0.9             | 0.5    | 2.3             | 1.2    | 0.28    |
| IL-17F               | 0.6             | 0.3    | 3.8             | 2.0    | 0.16    |
| IL-18                | 0.4             | 0.0    | 0.5             | 0.1    | 0.41    |
| IL-21                | 2.0             | 0.5    | 2.1             | 0.9    | 0.95    |
| IL-22                | 39.2            | 11.2   | 42.7            | 11.0   | 0.83    |
| IL-23                | 45.5            | 21.6   | 67.8            | 28.7   | 0.55    |
| IL-27                | 32.7            | 14.0   | 53.8            | 28.0   | 0.52    |
| IL-33                | 5.2             | 1.9    | 4.6             | 1.9    | 0.83    |
| LIF                  | 174.0           | 100.8  | 56.8            | 15.5   | 0.28    |
| M-CSF                | 424.0           | 17.9   | 446.2           | 126.5  | 0.87    |
| PDGF-AA              | 9.1             | 1.3    | 14.3            | 2.5    | 0.10    |
| PDGF-AB/BB           | 33.0            | 8.4    | 30.1            | 13.2   | 0.86    |
| sCD40L               | 17.3            | 4.2    | 23.1            | 5.7    | 0.43    |
| TGFα                 | 1.7             | 0.3    | 3.0             | 1.0    | 0.22    |
| TNFβ                 | 18.5            | 3.9    | 26.0            | 7.6    | 0.40    |
| TRAIL                | 1.9             | 0.5    | 2.5             | 0.6    | 0.44    |

**Table S3.** Secretion of cytokines, chemokines and growth factors for HCMV uninfected and infected Hs578T breast cancer cells.

| Cytokines/Chemokines | Neg Control<br>N = 5 |         | CMV<br>N = 5    |         | P-Value |
|----------------------|----------------------|---------|-----------------|---------|---------|
|                      | (pg/mg Protein)      |         | (pg/mg Protein) |         |         |
|                      | Mean                 | SEM     | Mean            | SEM     |         |
| CCL1                 | 0.8                  | 0.2     | 0.5             | 0.0     | 0.24    |
| CCL2                 | 116980.0             | 54509.0 | 26232.0         | 15880.0 | 0.15    |
| CCL3                 | 1.6                  | 1.0     | 1.4             | 0.8     | 0.85    |
| CCL8                 | 20.4                 | 6.4     | 11.0            | 4.8     | 0.28    |
| CCL11                | 99.0                 | 47.5    | 149.8           | 123.8   | 0.71    |
| CCL26                | 69.4                 | 34.5    | 0.0             | 0.0     | 0.08    |
| CXCL5                | 17.3                 | 5.9     | 7.2             | 3.8     | 0.19    |
| CXCL9                | 3.5                  | 0.8     | 2.2             | 0.4     | 0.20    |
| CXCL13               | 1.4                  | 0.4     | 1.1             | 0.3     | 0.46    |
| FGF-β                | 2136.0               | 1446.0  | 29.0            | 4.7     | 0.22    |
| GM-CSF               | 18.4                 | 5.7     | 17.5            | 6.0     | 0.92    |
| IL-1α                | 18.0                 | 8.8     | 4.1             | 0.8     | 0.16    |
| IL-1RA               | 9.2                  | 4.8     | 1.0             | 0.2     | 0.13    |
| IL-6                 | 11561.0              | 3149.0  | 10197.0         | 2366.0  | 0.74    |
| IL-9                 | 4.9                  | 1.2     | 2.4             | 0.5     | 0.09    |
| IL-10                | 1.5                  | 0.4     | 0.9             | 0.2     | 0.23    |
| IL-15                | 25.9                 | 10.0    | 4.9             | 1.9     | 0.07    |
| IL-16                | 5.9                  | 2.9     | 0.6             | 0.6     | 0.11    |
| IL-17F               | 3.9                  | 1.5     | 1.4             | 0.3     | 0.14    |
| IL-20                | 373.8                | 156.7   | 334.0           | 90.4    | 0.83    |
| IL-23                | 73.4                 | 29.5    | 63.8            | 32.6    | 0.83    |
| IL-28A               | 4.0                  | 2.1     | 1.6             | 0.8     | 0.32    |
| IL-33                | 5.5                  | 1.6     | 5.3             | 1.5     | 0.93    |
| LIF                  | 12.7                 | 7.2     | 1.7             | 0.7     | 0.16    |
| TPO                  | 3.8                  | 2.8     | 5.6             | 4.1     | 0.72    |
| TRAIL                | 1.5                  | 0.4     | 1.2             | 0.3     | 0.58    |

**Table S4.** Secretion of cytokines, chemokines and growth factors for HCMV uninfected and infected MDA-MB-231 breast cancer cells.

| Cytokines/Chemokines | Neg Control     |       | CMV             |       | P-Value |
|----------------------|-----------------|-------|-----------------|-------|---------|
|                      | N = 3           |       | N = 3           |       |         |
|                      | (pg/mg Protein) |       | (pg/mg Protein) |       |         |
|                      | Mean            | SEM   | Mean            | SEM   |         |
| CCL1                 | 0.9             | 0.0   | 0.8             | 0.1   | 0.68    |
| CCL2                 | 14.9            | 9.2   | 21.2            | 8.5   | 0.64    |
| CCL5                 | 25.7            | 14.5  | 30.1            | 6.6   | 0.80    |
| CCL22                | 4.7             | 1.9   | 5.4             | 1.5   | 0.78    |
| CCL24                | 2.1             | 1.4   | 1.0             | 0.9   | 0.56    |
| CXCL5                | 35.1            | 8.3   | 8.2             | 8.2   | 0.08    |
| CXCL9                | 4.4             | 0.7   | 4.2             | 0.5   | 0.82    |
| CXCL10               | 10.8            | 8.0   | 10.8            | 2.1   | 0.99    |
| CXCL13               | 1.7             | 0.2   | 2.0             | 0.2   | 0.32    |
| FLT-3L               | 0.7             | 0.2   | 0.8             | 0.1   | 0.77    |
| IFN $\gamma$         | 0.6             | 0.1   | 0.6             | 0.0   | 0.76    |
| IL-1 $\beta$         | 0.5             | 0.4   | 1.4             | 0.8   | 0.40    |
| IL-1RA               | 1.0             | 0.1   | 2.9             | 2.3   | 0.45    |
| IL-4                 | 0.4             | 0.2   | 0.5             | 0.1   | 0.78    |
| IL-6                 | 58.1            | 22.0  | 61.7            | 31.2  | 0.93    |
| IL-8                 | 480.8           | 456.9 | 498.2           | 453.4 | 0.98    |
| IL-9                 | 2.0             | 1.0   | 3.5             | 0.3   | 0.23    |
| IL-10                | 1.5             | 0.1   | 1.5             | 0.0   | 0.84    |
| IL-12p40             | 1.9             | 0.7   | 3.1             | 0.2   | 0.18    |
| IL-13                | 4.2             | 2.4   | 1.3             | 1.3   | 0.35    |
| IL-15                | 0.7             | 0.3   | 0.9             | 0.4   | 0.69    |
| IL-17F               | 0.2             | 0.2   | 1.3             | 0.2   | 0.02    |
| IL-20                | 649.1           | 123.2 | 467.6           | 54.0  | 0.25    |
| IL-21                | 5.2             | 1.0   | 4.0             | 0.8   | 0.40    |
| IL-23                | 123.7           | 38.3  | 114.7           | 27.4  | 0.86    |
| IL-28A               | 5.0             | 0.6   | 3.9             | 1.2   | 0.42    |
| IL-33                | 8.5             | 0.6   | 7.9             | 1.0   | 0.64    |
| M-CSF                | 22.6            | 15.4  | 27.9            | 8.9   | 0.78    |
| PDGF-AA              | 93.8            | 50.1  | 143.9           | 32.0  | 0.45    |
| PDGF-AB/BB           | 93.6            | 67.7  | 180.6           | 45.4  | 0.35    |
| SCF                  | 9.3             | 0.5   | 9.0             | 2.6   | 0.92    |
| TGF $\alpha$         | 5.1             | 2.0   | 8.6             | 0.6   | 0.16    |
| TNF $\alpha$         | 2.8             | 2.1   | 4.2             | 1.1   | 0.60    |
| TNF $\beta$          | 1.8             | 0.8   | 1.9             | 0.8   | 0.96    |
| TRAIL                | 3.2             | 0.3   | 3.0             | 0.1   | 0.59    |
| VEGF-A               | 49.2            | 26.7  | 53.2            | 17.5  | 0.91    |
